# Supplementary material for: Microencapsulated Hepatocytes Differentiated from Human Induced Pluripotent Stem Cells: Optimizing 3D Culture for Tissue Engineering Applications
Source: MDPI journal article supplement (doi:10.3390/cells12060865), 2023-03-10
Supplement: s1 [file s1]

Supplementary

# Microencapsulated Hepatocytes Differentiated from Human Induced Pluripotent Stem Cells: Optimizing 3D Culture for Tissue Engineering Applications

Marwa Hussein <sup>1,2</sup>, Mattia Pasqua <sup>2,3</sup>, Ulysse Pereira <sup>2,3</sup>, Nassima Benzoubir <sup>1,2</sup>, Jean-Charles Duclos-Vallée <sup>1,2</sup>, Anne Dubart-Kupperschmitt <sup>1,2</sup>, Cecile Legallais <sup>2,3,\*</sup> and Antonietta Messina <sup>1,2,\*</sup>†

<sup>1</sup> UMR\_S 1193, INSERM/Université Paris Saclay, F-94800 Villejuif, France

<sup>2</sup> Fédération Hospitalo-Universitaire (FHU) Hépatinov, F-94800 Villejuif, France

<sup>3</sup> UMR CNRS 7338 Biomechanics & Bioengineering, Université de Technologie de Compiègne, Sorbonne Universités, F-60203 Compiègne, France

\* Correspondence: cecile.legallais@utc.fr (C.L.); antonietta.messina@inserm.fr (A.M.)

† These authors contributed equally to this work.

## Supplemental Materials and Methods

- Human induced pluripotent stem cell culture
- hiPSC differentiation into hepatoblasts (iHBs)
- Characterization of bead size and cell aggregation
- Cell viability assay
- Cell recovery from beads
- Nucleic acids extraction
- RT-PCR
- Immunofluorescence staining

## Supplemental Figures

- Figure S1. Assessment of hiPSC differentiation into iHBs
- Figure S2. Schematic representation of the alginate encapsulation procedure
- Figure S3. Differentiated non-encapsulated iHeps (Organoids (Orgs))

## Supplemental Tables

- Table S1. Protocol for hiPSC differentiation into hepatoblasts
- Table S2. Protocol for hepatoblast differentiation into hepatocytes
- Table S3. List of primary antibodies used for immunofluorescence staining
- Table S4. List of primer sequences used for gene expression analysis.
- Table S5. Summary table of hepatic functions

---

## Supplemental Materials and Methods

### *Culture of human induced pluripotent stem cells*

The hiPSC line (A29) used in this study had previously been established by Steichen et al. in 2014[1]. Undifferentiated hiPSC colonies were grown on Geltrex™ LDEV-Free Reduced Growth Factor Basement Membrane Matrix (Gibco) coated plates and maintained in StemMACS™ iPS-Brew XF (Miltenyi Biotec) at 37°C, under 5% O<sub>2</sub> and 5% CO<sub>2</sub>. The culture medium was refreshed every second day and the hiPSC colonies were routinely mechanically passaged for amplification at a ratio of 1:6 every week.

### *hiPSC differentiation into hepatoblasts (iHBs)*

Hepatoblast differentiation was performed using our previously published protocol with slight modifications[2]. Briefly, hiPSC colonies were dissociated using a 0.5% Trypsin-EDTA solution (Gibco) and seeded at a cell density of 4x10<sup>4</sup> cells/cm<sup>2</sup> with 10 mM Y-27632 on 0.1% porcine gelatin (Sigma-Aldrich) coated culture plates in StemMACS™ iPS-Brew XF. The hiPSCs were maintained at 37°C under 5% CO<sub>2</sub> until 70% confluency, then the differentiation protocol was initiated using RPMI-1640 medium (Gibco) complemented with B-27 serum-free supplement (Life Technologies), 1X MEM non-essential amino acid solution (NEAA, Gibco), 1X glutamin (Gibco) and 1X penicillin-streptomycin (Gibco) supplemented with growth factors and cytokines. For definitive endoderm differentiation, the hiPSCs were treated with 5 nM CHIR99021 (Miltenyi Biotech) for one day and 100 ng/ml Activin A (Miltenyi Biotech) and 10 nM LY294002 (Sigma-Aldrich) for the next four days. To achieve hepatic specification, medium was then supplied with 50 ng/ml Activin A, 10 ng/mL BMP4 (R&D Systems) and 20 ng/mL FGF2 (Miltenyi Biotech) from day 5 to day 7 of differentiation. The hepatic endoderm cells thus obtained were treated with 20 ng/ml HGF (Miltenyi Biotech) and 30 ng/ml FGF4 (Miltenyi Biotech) for 2 days to generate hepatoblasts (iHBs).

### *Characterization of bead size and cell aggregation*

The evolution of the size of beads and encapsulated aggregates over time was determined by measuring their diameter using open-source ImageJ software. For each time point, more than 40 phase contrast images are taken using the inverted microscope and used to measure the size of aggregates and beads. Means and standard deviations were calculated.

### *Cell recovery from beads*

Cells were retrieved from the capsules by incubating with a depolymerizing solution (55 mM sodium citrate, 50 mM EDTA and 10 mM HEPES in PBS) for 5 min at 37°C. The cells were then collected by centrifugation at 480g for 10 minutes. The cell pellet was washed 3 times with PBS and the samples were processed immediately for nucleic acid extraction, or were frozen at -80°C.

### *Nucleic acid extraction*

Total RNA and DNA were extracted using Trizol reagent (Sigma-Aldrich) and purified with the Direct-zol™ DNA/RNA MiniPrep extraction kit (Zymo Research) according to the manufacturer's instructions. The concentrations of extracted RNA and DNA were determined by Nanodrop UV-visible Lite (ThermoFisher). The DNA concentration was used to define the number of cells per sample and to normalize the metabolic activity of the cells, while the RNA concentration was used for gene expression analysis by RT-PCR.

### *RT-PCR*

---

---

RT-PCR (reverse transcriptase-PCR) was executed using SuperScript™ First-Strand Synthesis System for RT-PCR (Invitrogen) with oligoDT primers, Platinum Taq DNA Polymerase (Invitrogen) and gene primers (Table S2), according to the manufacturer's instructions.

***Immunofluorescence staining***

Samples were fixed in 4% w/v paraformaldehyde (PFA) for 30 minutes and 4 hours, respectively. The aggregates and encapsulated aggregates were embedded in sucrose-gelatin solution and frozen in liquid nitrogen. The resulting blocks were cut into 7 µm thick sections on a Leica Biosystems Cryostat. The sections and 2D cells were then permeabilized with 0.1% v/v Triton X-100 in PBS for 20 minutes, and saturated with 3% w/v BSA (Sigma) for 30 minutes. The samples were incubated with primary antibodies overnight at 4°C. They were then rinsed 3 times with PBS, and incubated with the appropriate secondary antibodies for 1 hour at room temperature followed by DAPI incubation to counterstain the nuclei. The list of antibodies is shown in Table S3. The samples were mounted with mounting solution (DAKO) and coverslips, and images were acquired using the EVOS™ FL automated imaging system and/or a Leica SP5 confocal microscope.

## Supplemental Materials and Methods

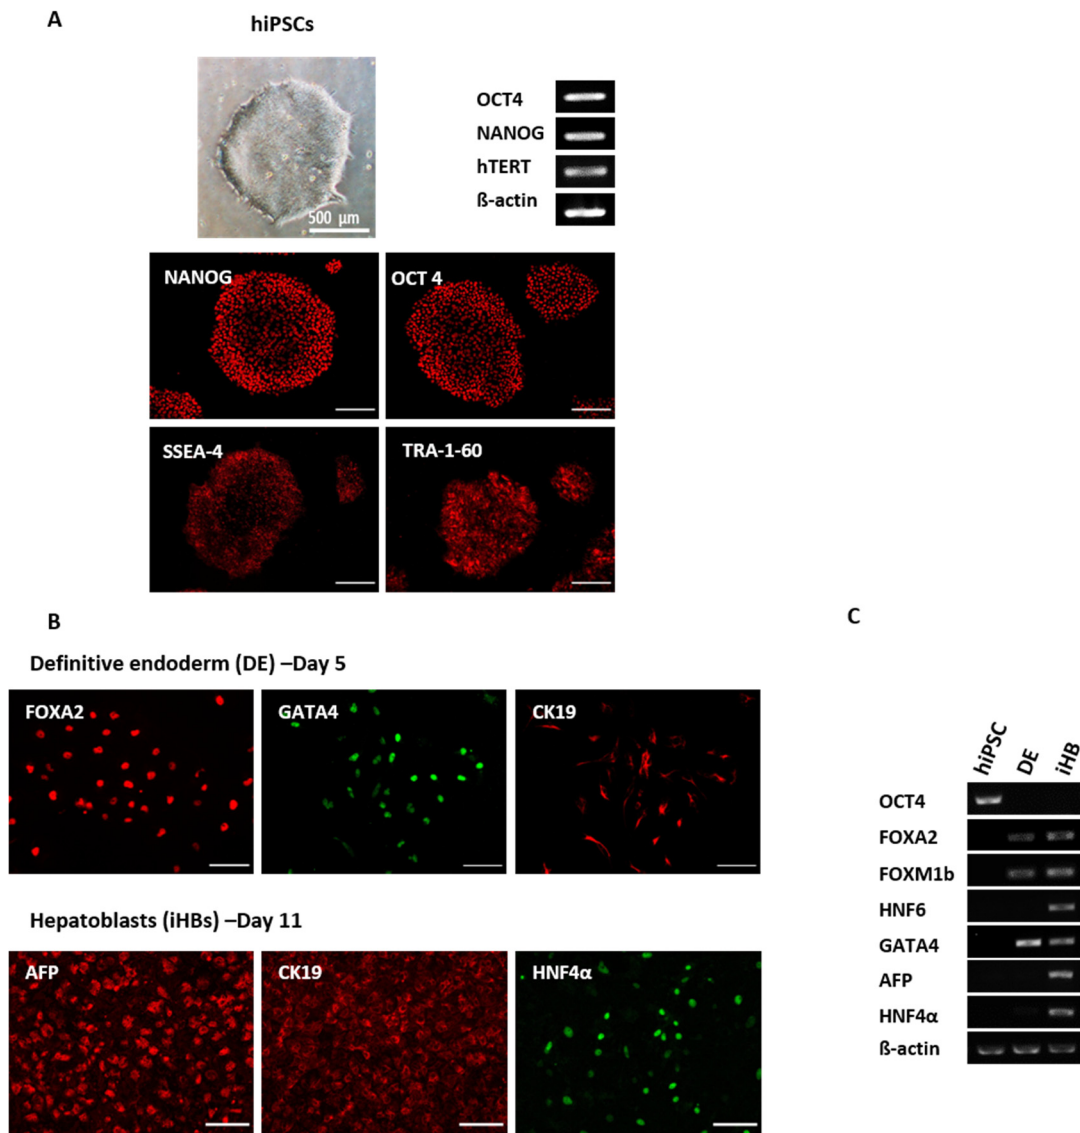

**Figure S1.** Assessment of hiPSC differentiation into iHBs. (A) Brightfield image and immunofluorescence staining of stemness markers of hiPSCs. (Scale bar= 200 µm). (B) Immunofluorescence labeling of endoderm and hepatoblast markers at day 5 and day 11, respectively. Scale bar = 100 µm. (C) RT-PCR analysis of the gene expression of stemness and hepatoblast markers over time for hiPSCs, the definitive endoderm (DE) and iHBs.

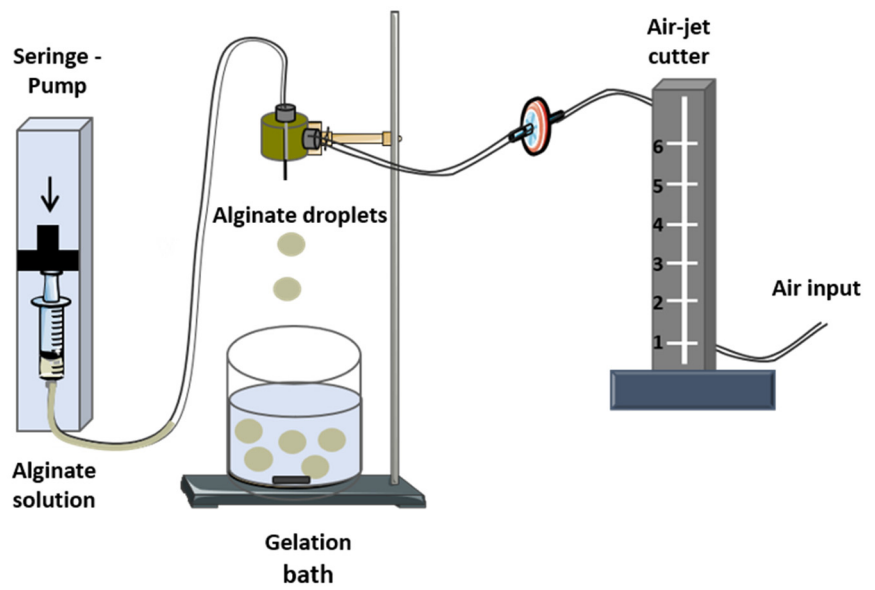

**Figure S2.** Schematic representation of the alginate encapsulation procedure.

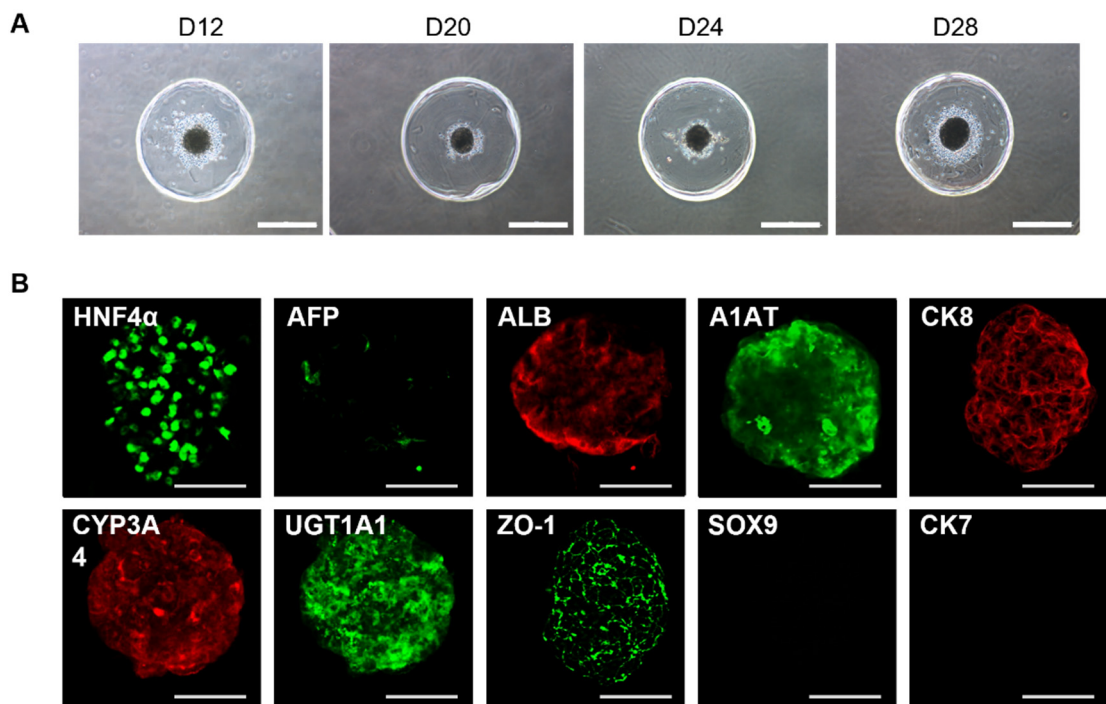

**Figure S3.** Differentiated non-encapsulated iHeps (Organoids (Orgs)). (A) Brightfield images of iHep-Orgs within agarose microwells. Scale bars = 500  $\mu$ m. (B) Immunostaining analysis of hepatic-specific genes at final steps of iHep-Orgs. Scale bar= 150  $\mu$ m. (C, D) Plasma protein AFP and ALB secretion by iHeps in Orgs and 2D are shown at the time points indicated. Histograms represent mean  $\pm$  SD (n >10).

---

## Supplemental Tables

**Table S1.** Protocol for hiPSC differentiation into hepatoblasts

| Day      | Culture medium                                              | Growth factors and cytokines                       |
|----------|-------------------------------------------------------------|----------------------------------------------------|
| -2 et -1 | StemMACS™ iPS-Brew XF (Miltenyi Biotec)                     | 10 $\mu$ M Y27632                                  |
| 0        | RPMI-1640 (Gibco) / B-27 (Life Technologies)                | 5 nM CHIR                                          |
| 1 – 4    | RPMI-1640 (Gibco) / B-27 (Life Technologies)                | 100 ng/mL Activin A + 10 nM LY294002               |
| 5 – 7    | RPMI-1640 (Gibco) / B-27 (Life Technologies)                | 10 ng/mL BMP4 + 20 ng/mL FGF2 + 50 ng/mL Activin A |
| 8 – 9    | RPMI-1640 <sup>-Met</sup> (Gibco)/ B-27 (Life Technologies) | 20 ng/mL HGF + 30 ng/mL FGF4                       |
| 10       | HCM™ (Lonza)                                                | 20 ng/mL HGF + 10 ng/mL OSM +0.1 nM Dex            |

**Table S2.** Protocol for hepatoblast differentiation into hepatocytes

| Day     | Culture medium | Growth factors and cytokines                                                      |
|---------|----------------|-----------------------------------------------------------------------------------|
| 11 – 17 | HCM™ (Lonza)   | 20 ng/mL de HGF +0.1 nM Dex + 20 ng/mL OSM                                        |
| 18 – 20 | HCM™ (Lonza)   | 20 ng/mL de HGF +0.1 nM Dex + 20 ng/mL OSM + 10 ng/mL VK                          |
| 21      | HCM™ (Lonza)   | 20 ng/mL de HGF +0.05 nM Dex + 20 ng/mL OSM + 10 ng/mL VK + 0.5 nM CE and 5 nM SB |
| 22 - 23 | HCM™ (Lonza)   | 20 ng/mL de HGF +0.1 nM Dex + 10 ng/mL OSM + 10 ng/mL VK + 0.5 nM CE and 5 nM SB  |
| 24 - 25 | HCM™ (Lonza)   | 20 ng/mL de HGF +0.05 nM Dex + 5 ng/mL OSM + 10 ng/mL VK + 0.5 nM CE and 5 nM SB  |
| 26 - 27 | HCM™ (Lonza)   | 20 ng/mL de HGF + 1 nM Dex + 10 ng/mL VK + 0.5 nM CE and 5 nM SB                  |
| 28      | HCM™ (Lonza)   | 20 ng/mL de HGF + 0.5 nM Dex + 10 ng/mL VK + 0.5 nM CE and 5 nM SB                |

**Table S3.** List of primary antibodies used for immunofluorescence staining

| Protein                         | Reference                  | Type                  | Dilution |
|---------------------------------|----------------------------|-----------------------|----------|
| NANOG                           | R&D AF1997                 | Polyclonal rabbit IGG | 1/100    |
| TRA-1-60                        | Millipore MAB4360          | Polyclonal mouse IGG  | 1/150    |
| SSEA-4                          | Millipore MAB4304          | Polyclonal mouse IGG  | 1/150    |
| OCT3/4                          | Santa Cruz sc-5279         | Monoclonal mouse IgG  | 1/200    |
| GATA4                           | Santa Cruz sc-1237         | Polyclonal goat IgG   | 1/200    |
| HNF3 $\beta$ (FoxA2)            | Santa Cruz sc-6554         | Polyclonal goat IgG   | 1/100    |
| HNF4 $\alpha$                   | Santa Cruz SC-8987         | Polyclonal rabbit IGG | 1/200    |
| AAT ( $\alpha$ -1-antitrypsine) | DAKO A0012                 | Polyclonal rabbit IGG | 1/200    |
| AFP                             | Santa Cruz SC-8399         | Polyclonal rabbit IGG | 1/200    |
| ALB                             | DAKO A0001                 | Polyclonal rabbit IGG | 1/200    |
|                                 | Sigma A6684                | Monoclonal mouse IgG  | 1/200    |
| CK7                             | DAKO M7018                 | Monoclonal mouse IgG  | 1/100    |
| CK18                            | Santa Cruz sc-8020         | Monoclonal mouse IgG  | 1/200    |
| CK19                            | DAKO M0888                 | Monoclonal mouse IgG  | 1/200    |
| CYP3A4                          | Santa Cruz sc-53850        | Monoclonal mouse IgG  | 1/100    |
| SOX9                            | Santa Cruz sc-166505 AF488 | Monoclonal mouse IgG  | 1/100    |
| UGTA1                           | Santa Cruz sc-271268       | Monoclonal mouse IgG  | 1/200    |
| ZO-1                            | Biotechne NBP1-85047       | Polyclonal rabbit IgG | 1/200    |
| F-Actin (Phalloidin)            | Life Technologies A12381   |                       | 1/200    |

**Table S4.** List of primer sequences used for gene expression analysis

|                     |                                    |
|---------------------|------------------------------------|
| OCT4                | GTG GAG GAA GCT GAC AAC AA         |
|                     | CAG GTT TTC TTT CCC TAG CT         |
| NANOG               | TCC AAC ATC CTG AAC CTC AG         |
|                     | GAC TGG ATG TTC TGG GTC TG         |
| HNF3 $\beta$ /FOXA2 | GCG ACC CCA AGA CCT ACA G          |
|                     | GGT TCT GCC GGT AGA AGG G          |
| HNF6                | ATC CAC AAC TCC CAG CAA GG         |
|                     | GGT GTG TTG CCT CTA TCC TT         |
| AFP                 | TTT TGG GAC CCG AAC TTT CC         |
|                     | CTC CTG GTA TCC TTT AGC AAC TCT    |
| A1AT                | CCA ACA GCA CCA ATA TCC ATC TTC    |
|                     | GTC CTC TTC CTC GGT GTC CTT G      |
| HNF4 $\alpha$       | CGG GTG TCC ATA CGC ATC CTT G      |
|                     | GAC CCT CCC AGC AGC ATC TCC T      |
| ALB                 | CCT TTG GCA CAA TGA AGT GGG TAA CC |
|                     | CAG CAG TCA GCC ATT CAC CAT AGG    |
| CYP3A4              | GAT TTG GCT CCT CTG CTT CT         |
|                     | GCC TCC TGT GTA GTG AGA TTA C      |
| CYP3A7              | ATT CCA AGC TAT GTT CTT CAT CAT    |
|                     | AAT CTA CTT CCC CAG CAC TGA        |
| ACTIN               | GCA CTC TTC CAG CCT TCC TTC C      |
|                     | CTG CTG TCA CCT TCA CCG TTC C      |



**Table S5.** Summary table of hepatic functions. This Table recapitulates the function profiles obtained with E-iHep-Orgs by comparison with those obtained from studies based on the encapsulation of human hepatocytes of different origins.

| Type de cell                                 | ALB synthesis<br>[ $\mu\text{g}/10^6$<br>cells/24h] | Urea synthesis<br>[ $\mu\text{g}/\text{ml}/10^6$<br>cells/h] | phase I<br>[nmol/ $10^6$ cells/1h] |                          | Lactate detoxifi-<br>cation<br>[nmol/ $10^6$<br>cells/h] | Ammonia detoxifi-<br>cation [nmol/ $10^6$<br>cells/h] |
|----------------------------------------------|-----------------------------------------------------|--------------------------------------------------------------|------------------------------------|--------------------------|----------------------------------------------------------|-------------------------------------------------------|
| E-iHeps – Our experimental<br>results        | 2.1                                                 | 1.8 $\pm$ 0.26                                               | CYP1A1/2                           | 1.8                      | 646 $\pm$ 41                                             | 857 $\pm$ 98                                          |
|                                              |                                                     |                                                              | CYP3A4                             | 130 $\pm$ 26             |                                                          |                                                       |
| Encapsulated HepG2 cells[3]                  | 54 $\pm$ 8                                          | -                                                            | CYP1A2<br>(MROD)                   | 0.576 $\pm$<br>0.036     | -                                                        | -                                                     |
|                                              |                                                     |                                                              | CYP3A4<br>(BROD)                   | 2.35 $\pm$<br>0.36       |                                                          |                                                       |
| Encapsulated C3A cells[4]                    | 2                                                   | 0.08                                                         | -                                  | -                        | -                                                        | 5.7                                                   |
| Encapsulated HepaRG cells[5]                 | 30 $\pm$ 19                                         | -                                                            | CYP1A2<br>(EROD)                   | 0.00067 $\pm$<br>0.00024 | 167 $\pm$ 24                                             | 119 $\pm$ 2                                           |
|                                              |                                                     |                                                              | CYP3A4<br>(BROD)                   | 0.00148 $\pm$<br>0.0003  |                                                          |                                                       |
| Encapsulated human fetal<br>hepatoblasts [6] | 16                                                  | 0.25                                                         | -                                  | -                        | -                                                        | -                                                     |
| Encapsulated human ESCs [7]                  | 0.15                                                | 5                                                            | -                                  | -                        | -                                                        | -                                                     |
| Encapsulated human ESC ag-<br>gregates[8]    | 1.7                                                 | 1.1                                                          | -                                  | -                        | -                                                        | -                                                     |

---

### Supplemental references

1. Steichen, C.; Luce, E.; Maluenda, J.; Tosca, L.; Moreno-Gimeno, I.; Desterke, C.; Dianat, N.; Goulinet-Mainot, S.; Awan-Toor, S.; Burks, D.; et al. Messenger RNA- versus Retrovirus-Based Induced Pluripotent Stem Cell Reprogramming Strategies: Analysis of Genomic Integrity. *Stem Cells Transl. Med.* **2014**, *3*, 686–691, doi:10.5966/sctm.2013-0158.
  2. Messina, A.; Luce, E.; Benzoubir, N.; Pasqua, M.; Pereira, U.; Humbert, L.; Eguether, T.; Rainteau, D.; Duclos-Vallée, J.-C.; Legallais, C.; et al. Evidence of Adult Features and Functions of Hepatocytes Differentiated from Human Induced Pluripotent Stem Cells and Self-Organized as Organoids. *Cells* **2022**, *11*, 537, doi:10.3390/cells11030537.
  3. Rahman, T.M.; Selden, C.; Khalil, M.; Diakanov, I.; Hodgson, H.J.F. Alginate-Encapsulated Human Hepatoblastoma Cells in an Extracorporeal Perfusion System Improve Some Systemic Parameters of Liver Failure in a Xenogeneic Model. *Artif. Organs* **2004**, *28*, 476–482, doi:10.1111/j.1525-1594.2004.07259.x.
  4. David, B.; Dufresne, M.; Nagel, M.-D.; Legallais, C. In Vitro Assessment of Encapsulated C3A Hepatocytes Functions in a Fluidized Bed Bioreactor. *Biotechnol. Prog.* **2004**, *20*, 1204–1212, doi:10.1021/bp034301z.
  5. Pasqua, M.; Pereira, U.; Messina, A.; de Lartigue, C.; Vigneron, P.; Dubart-Kupperschmitt, A.; Legallais, C. HepaRG Self-Assembled Spheroids in Alginate Beads Meet the Clinical Needs for Bioartificial Liver. *Tissue Eng. Part A* **2020**, *ten.tea.2019.0262*, doi:10.1089/ten.tea.2019.0262.
  6. Cheng, N.; Wauthier, E.; Reid, L.M. Mature Human Hepatocytes from Ex Vivo Differentiation of Alginate-Encapsulated Hepatoblasts. *Tissue Eng. Part A* **2008**, *14*, 1–7, doi:10.1089/ten.a.2007.0131.
  7. Maguire, T.; Davidovich, A.; Wallenstein, E.; Novik, E.; Sharma, N.; Pedersen, H.; Androulakis, I.; Schloss, R.; Yarmush, M. Control of Hepatic Differentiation via Cellular Aggregation in an Alginate Microenvironment. *Biotechnol. Bioeng.* **2007**, *98*, 631–644, doi:10.1002/bit.21435.
  8. Fang, S.; Qiu, Y.; Mao, L.; Shi, X.; Yu, D.; Ding, Y. Differentiation of Embryoid-Body Cells Derived from Embryonic Stem Cells into Hepatocytes in Alginate Microbeads in Vitro. *Acta Pharmacol. Sin.* **2007**, *28*, 1924–1930, doi:10.1111/j.1745-7254.2007.00713.x.
-
